# Supplementary material for: Lifetime patient outcomes and healthcare utilization for Bronchopulmonary dysplasia (BPD) and extreme preterm infants: a microsimulation study
Source: Springer Nature journal article supplement (doi:10.1186/s12887-020-02037-5), 2020-03-25

Density Distribution

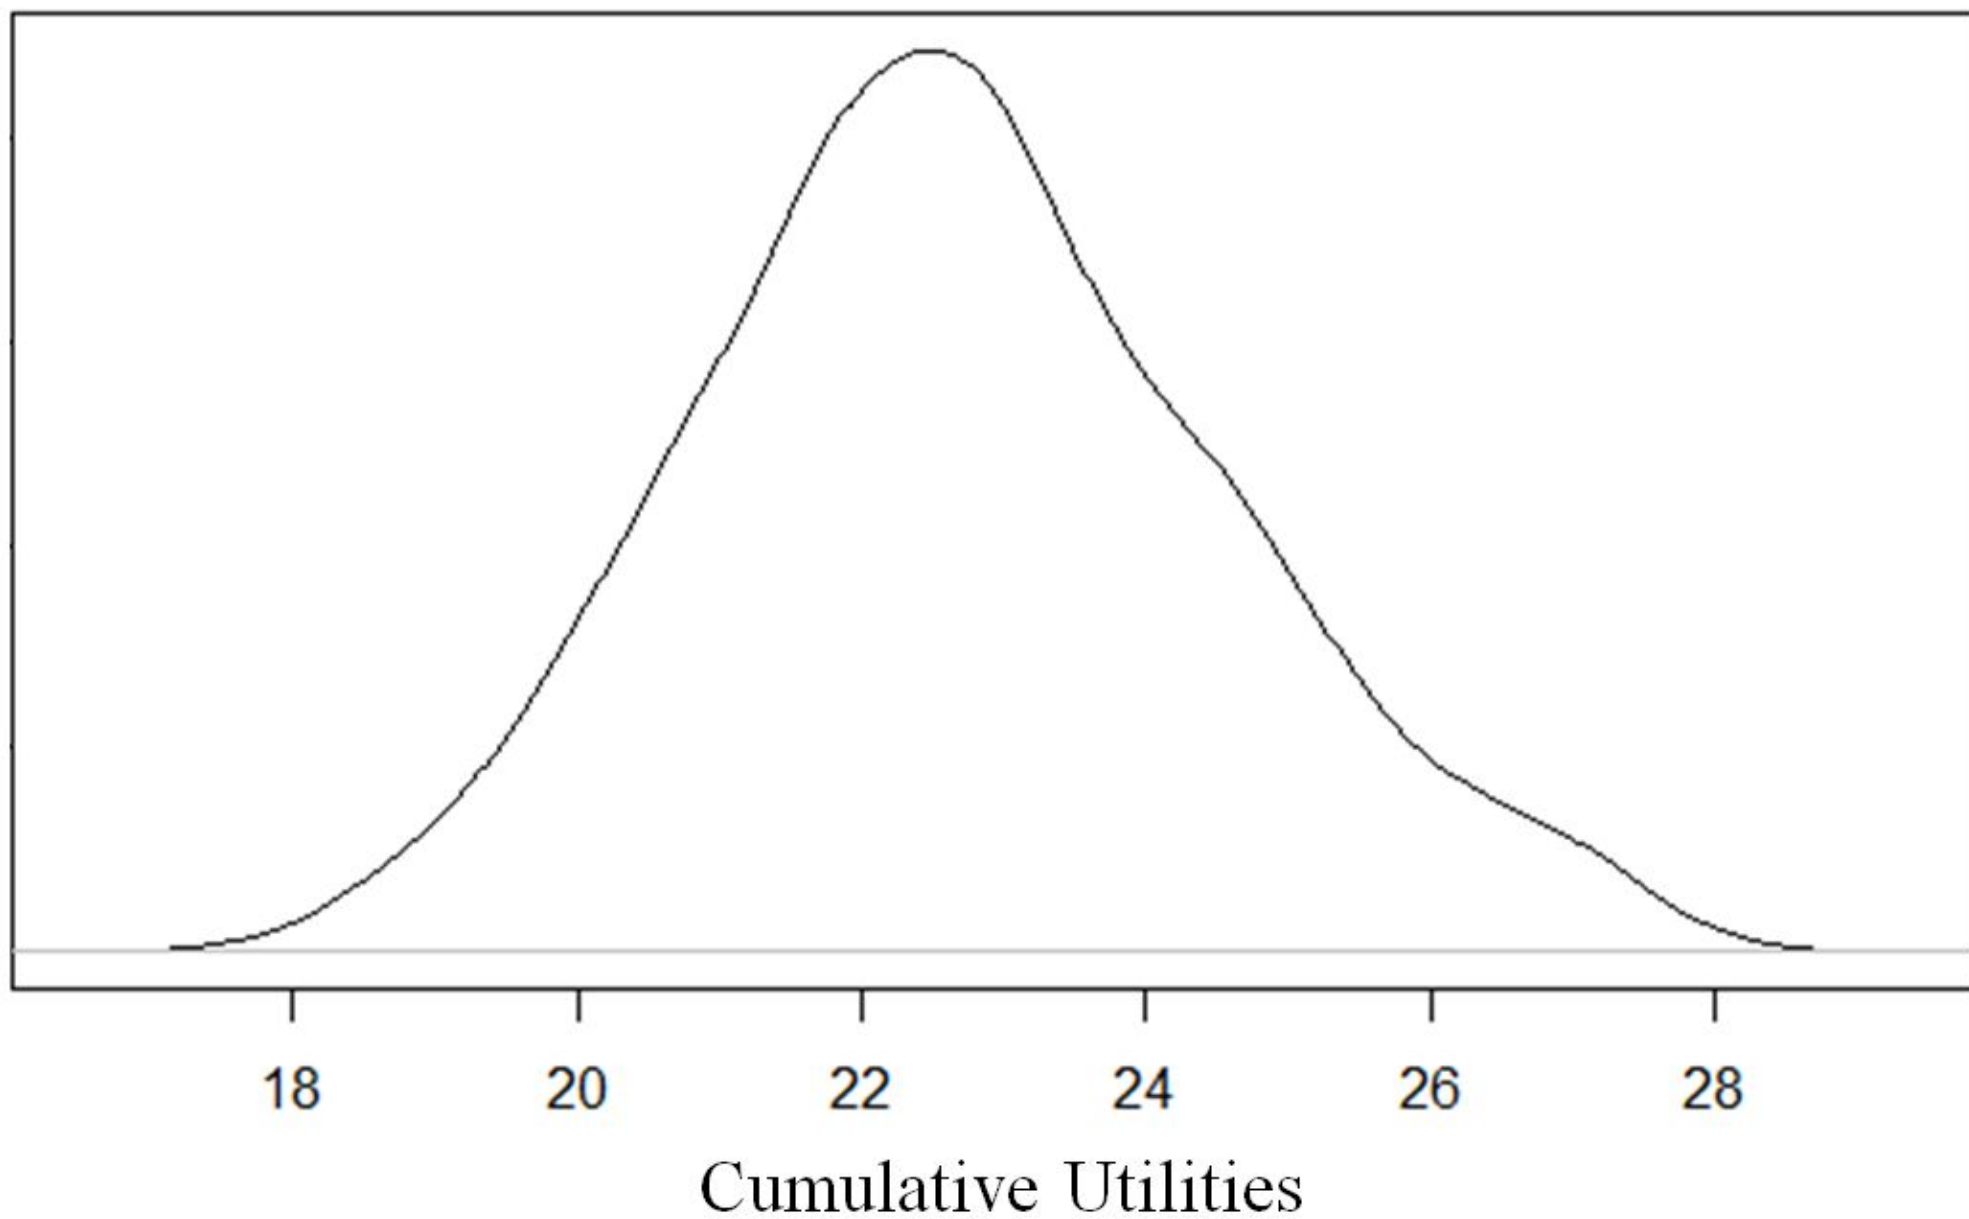

Supplement: MOESM1 [file 17832234]
